# Supplementary material for: Hypoxia activates Wnt/β-catenin signaling by regulating the expression of BCL9 in human hepatocellular carcinoma
Source: PubMed Central journal article supplement (PMC5225427; doi:10.1038/srep40446), 2017-01-11
Supplement: srep40446-s1.pdf [file srep40446-s1.pdf]

# **Hypoxia activates Wnt/ $\beta$ -catenin signaling by regulating the expression of BCL9 in human hepatocellular carcinoma**

Wei Xu, MD<sup>1\*</sup>; Wang Zhou, MD<sup>1\*</sup>; Mo Cheng, MD<sup>1\*</sup>; Jing Wang, MD<sup>1,3\*</sup>;  
Zhian Liu, MD<sup>3</sup>; Shaohui He, MD<sup>1</sup>; Xiangji Luo, MD<sup>4</sup>; Wending Huang, MD<sup>2</sup>;  
Tianrui Chen, MD<sup>1</sup>; Wangjun Yan, MD<sup>1,2 $\Delta$</sup>  and Jianru Xiao, MD<sup>1 $\Delta$</sup>

1. Department of Orthopedic Oncology, Changzheng Hospital, Second Military Medical University, NO. 415, Fengyang Road, Shanghai, 200003, China.
2. Department of Bone and soft tissue tumors, Fudan Cancer Center, Fudan University, NO. 270, Dong'an Road, Shanghai, 200000, China
3. Department of Anatomy, Xuzhou Medical University, NO. 209, Tongshan Road, Xuzhou, 221004, China
4. Department of Biliary Surgery, Eastern Hepatobiliary Surgery Hospital, Second Military Medical University, NO. 225, Changhai Road, Shanghai, 200438, China

\* These authors contributed equally to this study.

## **$\Delta$ Corresponding author:**

Jianru Xiao and Wangjun Yan, Department of Orthopedic Oncology, Changzheng Hospital, Second Military Medical University, 415 Fengyang Road, Shanghai, 200003, China. Phone:(086)021-13701785283, Fax: (086)021-81885634, Email: [jianruxiao83@163.com](mailto:jianruxiao83@163.com) and [13917966770@163.com](mailto:13917966770@163.com)

## **Disclosures:**

Conflicts of interest: The authors disclose no conflicts.

**Supplementary table 1.** Correlation of BCL9 expression and clinicopathological parameters in hepatocellular carcinoma patients (N = 360)

| Variable                      | n   | BCL9 expression |    |    | P-value     |
|-------------------------------|-----|-----------------|----|----|-------------|
|                               |     | -               | +  | ++ |             |
| <b>Age</b>                    |     |                 |    |    |             |
| ≤ 55                          | 260 | 162             | 72 | 26 | 0.09        |
| > 55                          | 100 | 74              | 21 | 5  |             |
| <b>Gender</b>                 |     |                 |    |    |             |
| Male                          | 298 | 192             | 83 | 23 | 0.10        |
| Female                        | 62  | 44              | 10 | 8  |             |
| <b>Tumor size (cm)</b>        |     |                 |    |    |             |
| ≤ 5.0                         | 133 | 89              | 33 | 11 | 0.92        |
| > 5.0                         | 227 | 147             | 60 | 20 |             |
| <b>Edmondson invasion</b>     |     |                 |    |    |             |
| I                             | 242 | 162             | 64 | 16 | <b>0.00</b> |
| II                            | 37  | 8               | 14 | 15 |             |
| III                           |     |                 |    |    |             |
| <b>Microvascular invasion</b> |     |                 |    |    |             |
| (-)                           | 31  | 28              | 3  | 0  | 0.01        |
| (+)                           | 329 | 208             | 90 | 31 |             |
| <b>T-Stage</b>                |     |                 |    |    |             |
| 1                             | 32  | 28              | 4  | 0  | <b>0.02</b> |
| 2                             | 195 | 119             | 56 | 20 |             |
| 3                             | 105 | 74              | 21 | 10 |             |
| 4                             | 28  | 15              | 12 | 1  |             |
| <b>Lymphnode metastasis</b>   |     |                 |    |    |             |
| (-)                           | 332 | 218             | 83 | 31 | 0.15        |
| (+)                           | 28  | 18              | 10 | 0  |             |
| <b>Metastasis</b>             |     |                 |    |    |             |
| (-)                           | 357 | 235             | 91 | 31 | 0.26        |
| (+)                           | 3   | 1               | 2  | 0  |             |

**A HRE sites: A/GCGTG**

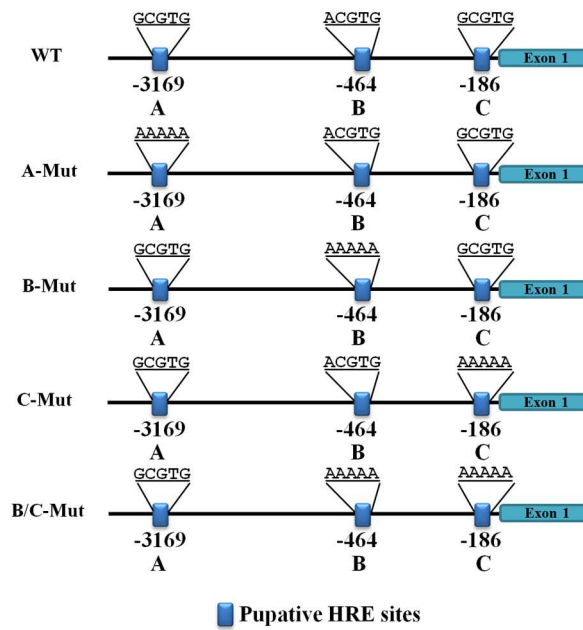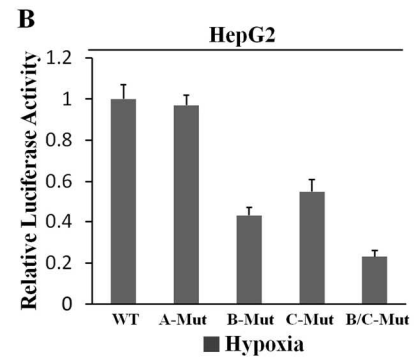

**Supplementary Figure 1. Mutating the HRE site confirmed that hypoxia interacted with HRE-B and HRE-C in the BCL9 promoter to induced its expression. (A)** The HRE-A mutant (A-Mut), HRE-B mutant (B-Mut), HRE-C mutant (C-Mut) as well as HRE-B/C mutant (B/C-Mut) were constructed, respectively. **(B)** The luciferase activities were significantly suppressed in B-Mut, C-Mut and B/C-Mut groups after treatment of hypoxia.
